# Supplementary material for: Determination of benzophenone and related compounds in plastic packaged baby food by ultra-high-performance liquid chromatography coupled to tandem mass spectrometry
Source: Royal Society of Chemistry journal article supplement (doi:10.1039/c9ay02134e), 2019-11-27
Supplement: c9ay02134e1.pdf [file c9ay02134e1.pdf]

## Electronic Supplementary Information (ESI†)

# Determination of benzophenone and related compounds in plastic-packaged baby food by ultra-high-performance liquid chromatography coupled to tandem mass spectrometry

N.I. Medina-Pérez, A. Arrizabalaga-Larrañaga, R. Seró, E. Moyano\*

Department of Chemical Engineering and Analytical Chemistry, University of Barcelona.  
Av. Diagonal 645, E-08028 Barcelona, Spain

\* Corresponding author: E. Moyano

## Table of Contents

|                                                                                                                                                                                      |    |
|--------------------------------------------------------------------------------------------------------------------------------------------------------------------------------------|----|
| <b>Supplementary Tables</b> .....                                                                                                                                                    | 2  |
| <b>Table S1:</b> MS/MS working conditions. ....                                                                                                                                      | 2  |
| <b>Table S2:</b> Matrix effect, extraction efficiency of BPs obtained in the dSPE UHPLC–MS/MS analysis of different matrices (yogurt, homemade custards and chocolate product). .... | 3  |
| <b>Table S3:</b> dSPE UHPLC–MS/MS quality parameters for the analysis of BPs in homemade custard and chocolate product matrices. ....                                                | 4  |
| <b>Supplementary Figures</b> .....                                                                                                                                                   | 5  |
| <b>Figure S1:</b> Product ion scan spectrum of a) BP b) PBZ and c) 4-MBP acquired in positive ion mode. ....                                                                         | 5  |
| <b>Figure S2:</b> Product ion scan spectrum of a) HMBP and b) DiOBP acquired in positive ion mode. ....                                                                              | 6  |
| <b>Figure S3:</b> Product ion scan spectrum of 44DHBP acquired in positive ion mode. ....                                                                                            | 6  |
| <b>Figure S4:</b> Product ion scan spectrum of a) HOBP and b) DEAB acquired in positive ion mode. ....                                                                               | 7  |
| <b>Figure S5:</b> Product ion scan spectrum of MBB acquired in positive ion mode. ....                                                                                               | 7  |
| <b>Figure S6:</b> Product ion scan spectrum of a) 24DHBP, b) THBP, c) TrHBP and d) HBP acquired in positive ion mode. ....                                                           | 8  |
| <b>Figure S7:</b> Product ion scan spectrum of a) CIHBP and b) 5CIHBP acquired in positive ion mode. ....                                                                            | 9  |
| <b>Figure S8:</b> MRM chromatogram with quantitation and confirmation transitions of the yogurt spiked sample at 50 µg kg <sup>-1</sup> level. ....                                  | 10 |
| <b>Figure S9:</b> Matrix matched calibration curves for a) MBB and b) PBZ in different matrices. ....                                                                                | 11 |

## Supplementary Tables

**Table S1:** MS/MS working conditions.

| Analyte | Precursor ion ( <i>m/z</i> ) | Quantitation               |         | Confirmation               |         | Tube lens (V) | Ion ratio | SD (%) |
|---------|------------------------------|----------------------------|---------|----------------------------|---------|---------------|-----------|--------|
|         |                              | Product ion ( <i>m/z</i> ) | NCE (%) | Product ion ( <i>m/z</i> ) | NCE (%) |               |           |        |
| 44DHBP  | 215                          | 121                        | 18      | 93                         | 31      | 83            | 4.7       | 0.2    |
| THBP    | 245                          | 135                        | 17      | 109                        | 23      | 73            | 1.4       | 0.01   |
| TrHBP   | 229                          | 151                        | 23      | 123                        | 29      | 75            | 1.6       | 0.01   |
| HBP     | 197                          | 92                         | 36      | 120                        | 27      | 90            | 6.5       | 0.1    |
| MBB     | 241                          | 209                        | 21      | 152                        | 35      | 73            | 1.6       | 0.03   |
| 24DHBP  | 213                          | 135                        | 22      | 91                         | 29      | 84            | 1.4       | 0.02   |
| DiOBP   | 245                          | 121                        | 17      | 151                        | 19      | 80            | 2.3       | 0.1    |
| BP      | 183                          | 105                        | 15      | 77                         | 34      | 80            | 2.1       | 0.1    |
| DHMBP   | 275                          | 151                        | 18      | 95                         | 35      | 80            | 6.6       | 0.2    |
| 4-MBP   | 197                          | 105                        | 16      | 77                         | 34      | 75            | 2.2       | 0.1    |
| HMBP    | 229                          | 151                        | 20      | 105                        | 19      | 80            | 3.8       | 0.1    |
| CIHBP   | 231                          | 121                        | 24      | 77                         | 32      | 84            | 3.3       | 0.1    |
| AHBP    | 255                          | 105                        | 18      | 177                        | 16      | 74            | 1.6       | 0.1    |
| 5CIHBP  | 245                          | 121                        | 25      | 77                         | 31      | 84            | 3.1       | 0.1    |
| PBZ     | 259                          | 105                        | 18      | 77                         | 36      | 75            | 1.9       | 0.1    |
| DEAB    | 325                          | 176                        | 25      | 281                        | 30      | 92            | 1.6       | 0.1    |
| HOBP    | 327                          | 137                        | 27      | 215                        | 19      | 95            | 1.6       | 0.05   |

**Table S2:** Matrix effect, extraction efficiency of BPs obtained in the dSPE UHPLC–MS/MS analysis of different matrices (yogurt, homemade custards and chocolate product).

| Analyte | YOGURT        |                       | HOMEMADE CUSTARDS |                       | PRODUCT CHOCOLATE |                       |
|---------|---------------|-----------------------|-------------------|-----------------------|-------------------|-----------------------|
|         | Matrix effect | Extraction efficiency | Matrix effect     | Extraction efficiency | Matrix effect     | Extraction efficiency |
|         | % (SD, %)     | % (SD, %)             | % (SD, %)         | % (SD, %)             | % (SD, %)         | % (SD, %)             |
| 44DHBP  | 6 (5)         | 83 (4)                | 7 (2)             | 80 (8)                | 6 (2)             | 90 (9)                |
| THBP    | 16 (5)        | 86 (9)                | 6 (6)             | 72 (4)                | 21 (9)            | 84 (10)               |
| TrHBP   | 12 (3)        | 82 (3)                | 15 (5)            | 86 (3)                | 24 (3)            | 95 (4)                |
| HBP     | 29 (4)        | 88 (2)                | 9 (4)             | 86 (3)                | 6 (1)             | 96 (5)                |
| MBB     | 16 (5)        | 81 (10)               | 5 (2)             | 80 (4)                | 7 (5)             | 107 (7)               |
| 24DHBP  | 5 (5)         | 88 (2)                | 7 (5)             | 86 (3)                | 5 (4)             | 95 (7)                |
| DiOBP   | 6 (5)         | 81 (8)                | 23 (6)            | 83 (12)               | 17 (8)            | 104 (11)              |
| BP      | 10 (5)        | 75 (4)                | 8 (3)             | 78 (8)                | 26 (8)            | 105 (10)              |
| DHMBP   | 9 (5)         | 87 (2)                | 16 (8)            | 94 (13)               | 28 (6)            | 100 (9)               |
| 4-MBP   | 14 (7)        | 81 (1)                | 20 (9)            | 79 (8)                | 30 (8)            | 92 (9)                |
| HMBP    | 15 (7)        | 85 (3)                | 19 (5)            | 85 (12)               | 42 (1)            | 102 (11)              |
| CIHBP   | 27 (8)        | 79 (9)                | 15 (5)            | 80 (10)               | 54 (4)            | 107 (9)               |
| AHBP    | 29 (6)        | 89 (3)                | 13 (4)            | 80 (4)                | 55 (3)            | 90 (3)                |
| 5CIHBP  | 39 (8)        | 80 (6)                | 13 (7)            | 80 (10)               | 59 (3)            | 92 (10)               |
| PBZ     | 38 (6)        | 85 (4)                | 13 (12)           | 79 (4)                | 54 (5)            | 95 (6)                |
| DEAB    | 15 (7)        | 88 (1)                | 4 (3)             | 78 (7)                | 52 (2)            | 100 (10)              |
| HOBP    | 89 (3)        | 49 (1)                | 43 (7)            | 37 (5)                | 98 (4)            | 65 (3)                |

**Table S3:** dSPE UHPLC–MS/MS quality parameters for the analysis of BPs in homemade custard and chocolate product matrices.

| Analyte | HOMEMADE CUSTARD               |                               |                           |                          |                           | CHOCOLATE PRODUCT              |                               |                           |                          |                           |
|---------|--------------------------------|-------------------------------|---------------------------|--------------------------|---------------------------|--------------------------------|-------------------------------|---------------------------|--------------------------|---------------------------|
|         | MLOQ ( $\mu\text{g kg}^{-1}$ ) | Run-to-run precision (RSD, %) |                           | Trueness (Rel. Error, %) |                           | MLOQ ( $\mu\text{g kg}^{-1}$ ) | Run-to-run precision (RSD, %) |                           | Trueness (Rel. Error, %) |                           |
|         |                                | Low level <sup>a</sup>        | Medium level <sup>b</sup> | Low level <sup>a</sup>   | Medium level <sup>b</sup> |                                | Low level <sup>a</sup>        | Medium level <sup>b</sup> | Low level <sup>a</sup>   | Medium level <sup>b</sup> |
| 44DHBP  | 19                             | -                             | 3                         | -                        | 4                         | 98                             | -                             | 4                         | -                        | 1                         |
| THBP    | 1.3                            | 9                             | 9                         | 2                        | 8                         | 1.2                            | 20                            | 9                         | 8                        | 7                         |
| TrHBP   | 1.8                            | 2                             | 8                         | 14                       | 8                         | 1.5                            | 16                            | 6                         | 14                       | 1                         |
| HBP     | 4.6                            | 4                             | 3                         | 10                       | 20                        | 1.1                            | 5                             | 4                         | 1                        | 6                         |
| 24DHBP  | 1.2                            | 3                             | 2                         | 1                        | 10                        | 1.2                            | 7                             | 3                         | 4                        | 6                         |
| MBB     | 4.5                            | 5                             | 2                         | 20                       | 7                         | 1.3                            | 3                             | 2                         | 5                        | 5                         |
| DiOBP   | 8.6                            | 3                             | 3                         | 4                        | 5                         | 4.1                            | 9                             | 7                         | 5                        | 1                         |
| BP      | 250                            | -                             | 2                         | -                        | 4                         | 92                             | -                             | 4                         | -                        | 1                         |
| DHMBP   | 3.9                            | 2                             | 1                         | 14                       | 2                         | 6.6                            | 5                             | 7                         | 18                       | 14                        |
| 4-MBP   | 34                             | 5                             | 2                         | 7                        | 4                         | 24                             | 7                             | 3                         | 1                        | 6                         |
| HMBP    | 48                             | 3                             | 2                         | 1                        | 4                         | 9.4                            | 9                             | 4                         | 2                        | 3                         |
| CIHBP   | 3.6                            | 2                             | 4                         | 4                        | 10                        | 48                             | 13                            | 4                         | 1                        | 2                         |
| AHBP    | 9.5                            | 1                             | 3                         | 5                        | 6                         | 8.8                            | 6                             | 3                         | 9                        | 13                        |
| 5CIHBP  | 42                             | 12                            | 4                         | 5                        | 7                         | 31                             | 11                            | 3                         | 1                        | 3                         |
| PBZ     | 9.3                            | 5                             | 3                         | 3                        | 1                         | 48                             | 6                             | 6                         | 15                       | 10                        |
| DEAB    | 21                             | 2                             | 1                         | 11                       | 9                         | 2.3                            | 5                             | 1                         | 10                       | 11                        |
| HOBP    | 59                             | -                             | 1                         | -                        | 1                         | 247                            | -                             | 5                         | -                        | 12                        |

(-) Below its MLOD

<sup>a</sup> Trueness at low level concentration ( $50 \mu\text{g kg}^{-1}$ )

<sup>b</sup> Trueness at medium level concentration ( $500 \mu\text{g kg}^{-1}$ )

## Supplementary Figures

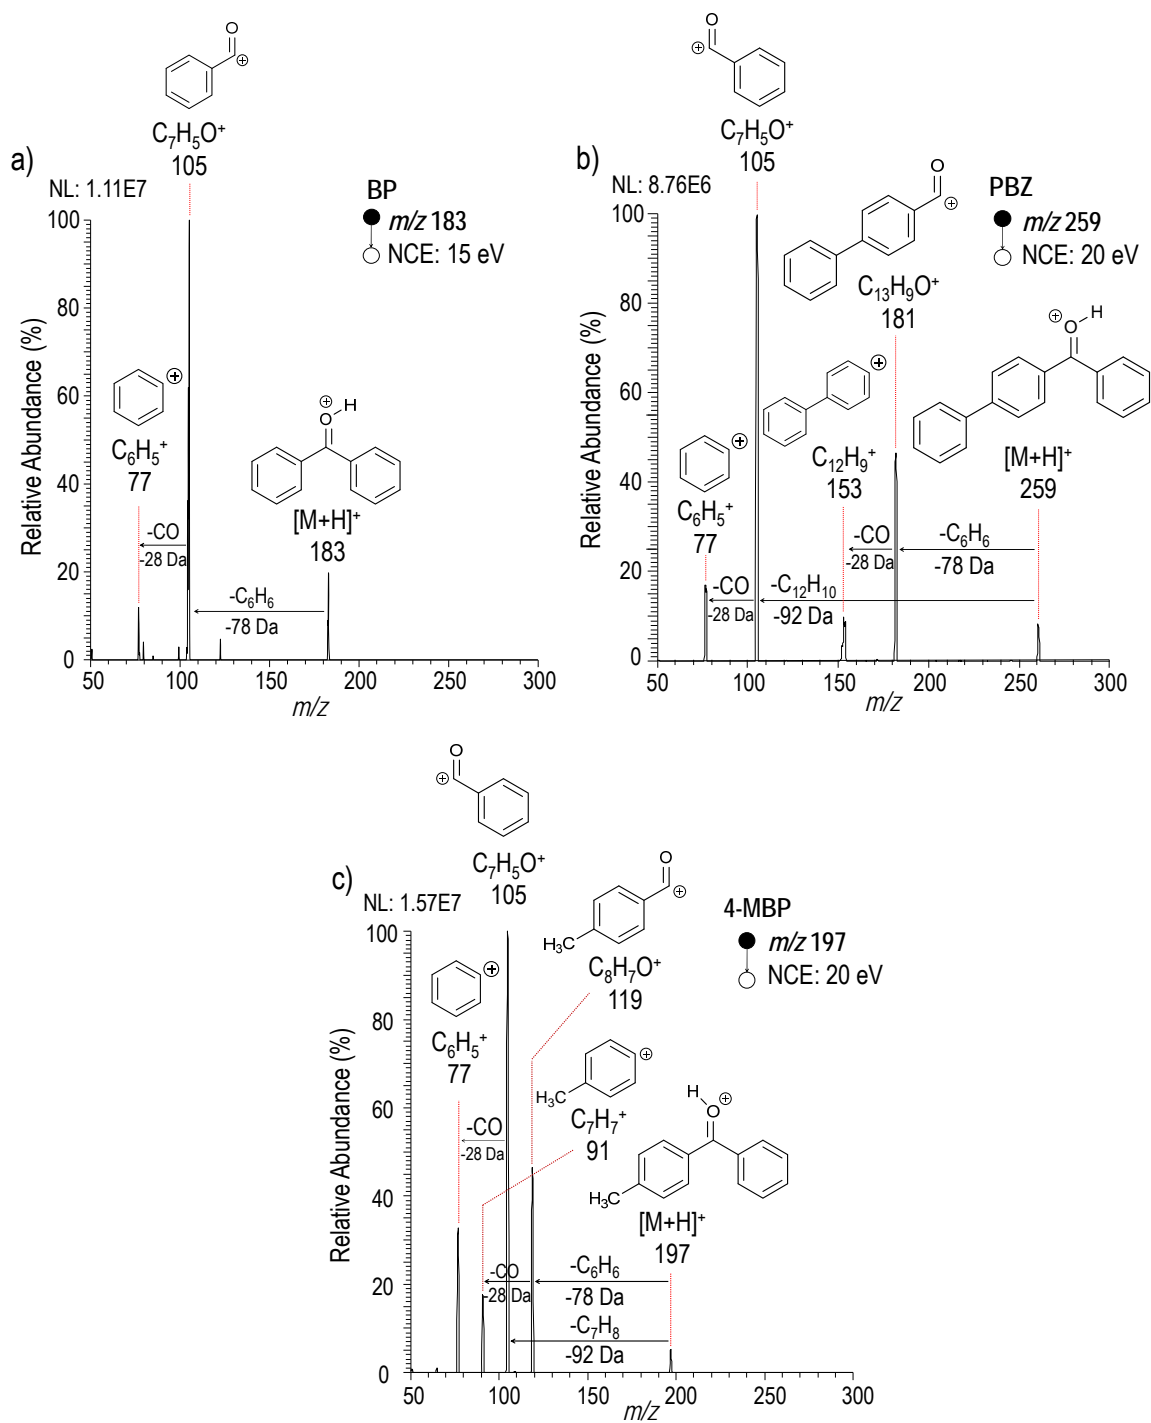

**Figure S1:** Product ion scan spectrum of a) BP b) PBZ and c) 4-MBP acquired in positive ion mode.

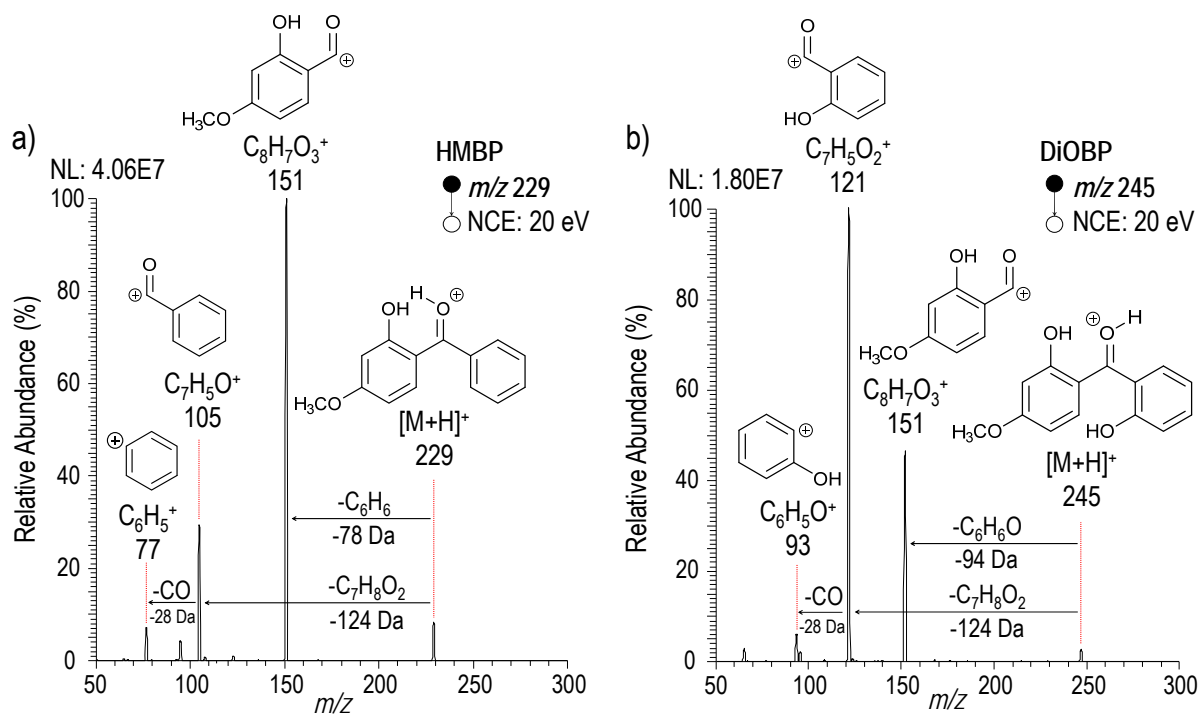

**Figure S2:** Product ion scan spectrum of a) HMBP and b) DiOBP acquired in positive ion mode.

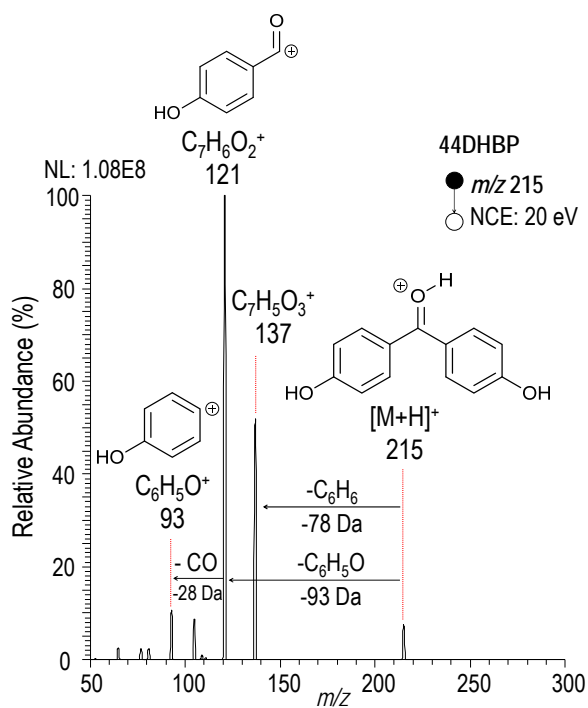

**Figure S3:** Product ion scan spectrum of 44DHBP acquired in positive ion mode.

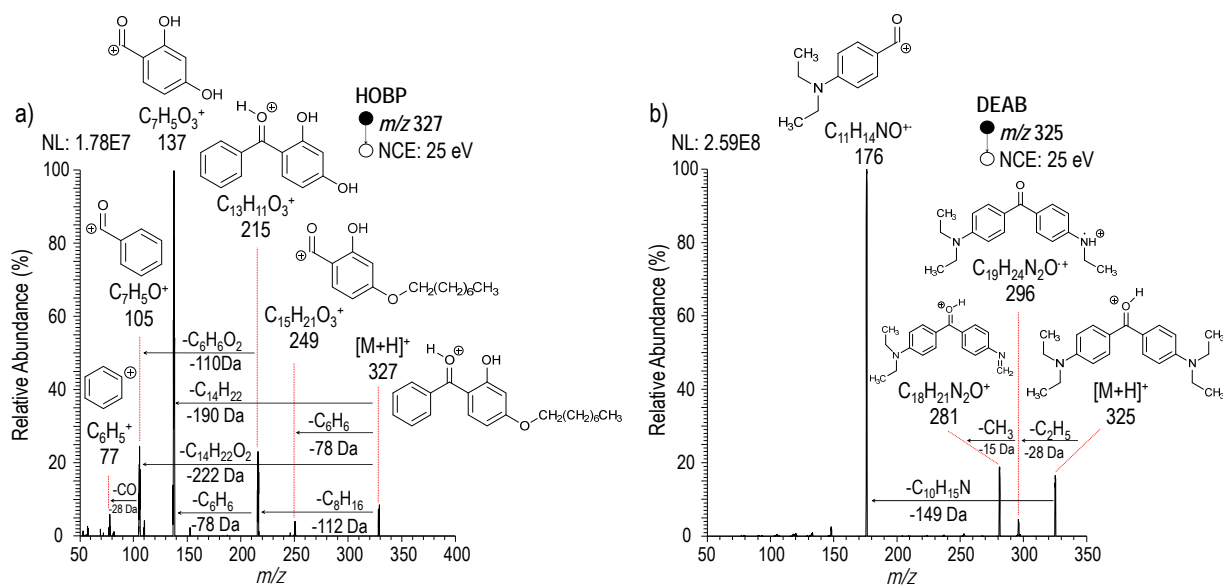

**Figure S4:** Product ion scan spectrum of a) HOBP and b) DEAB acquired in positive ion mode.

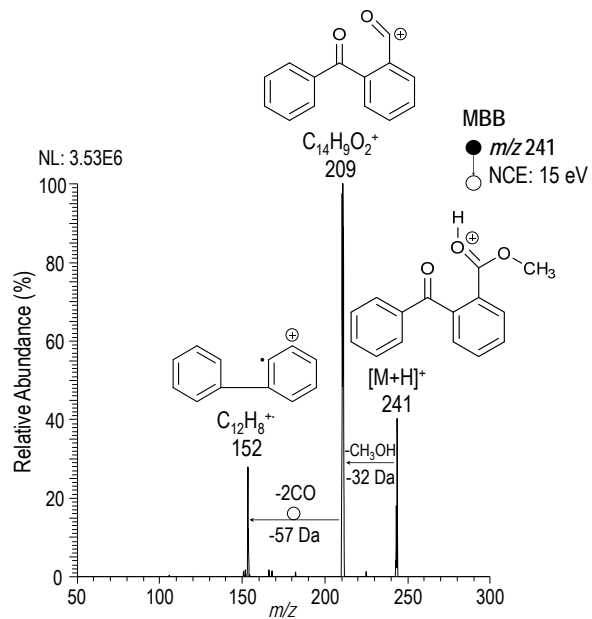

**Figure S5:** Product ion scan spectrum of MBB acquired in positive ion mode.

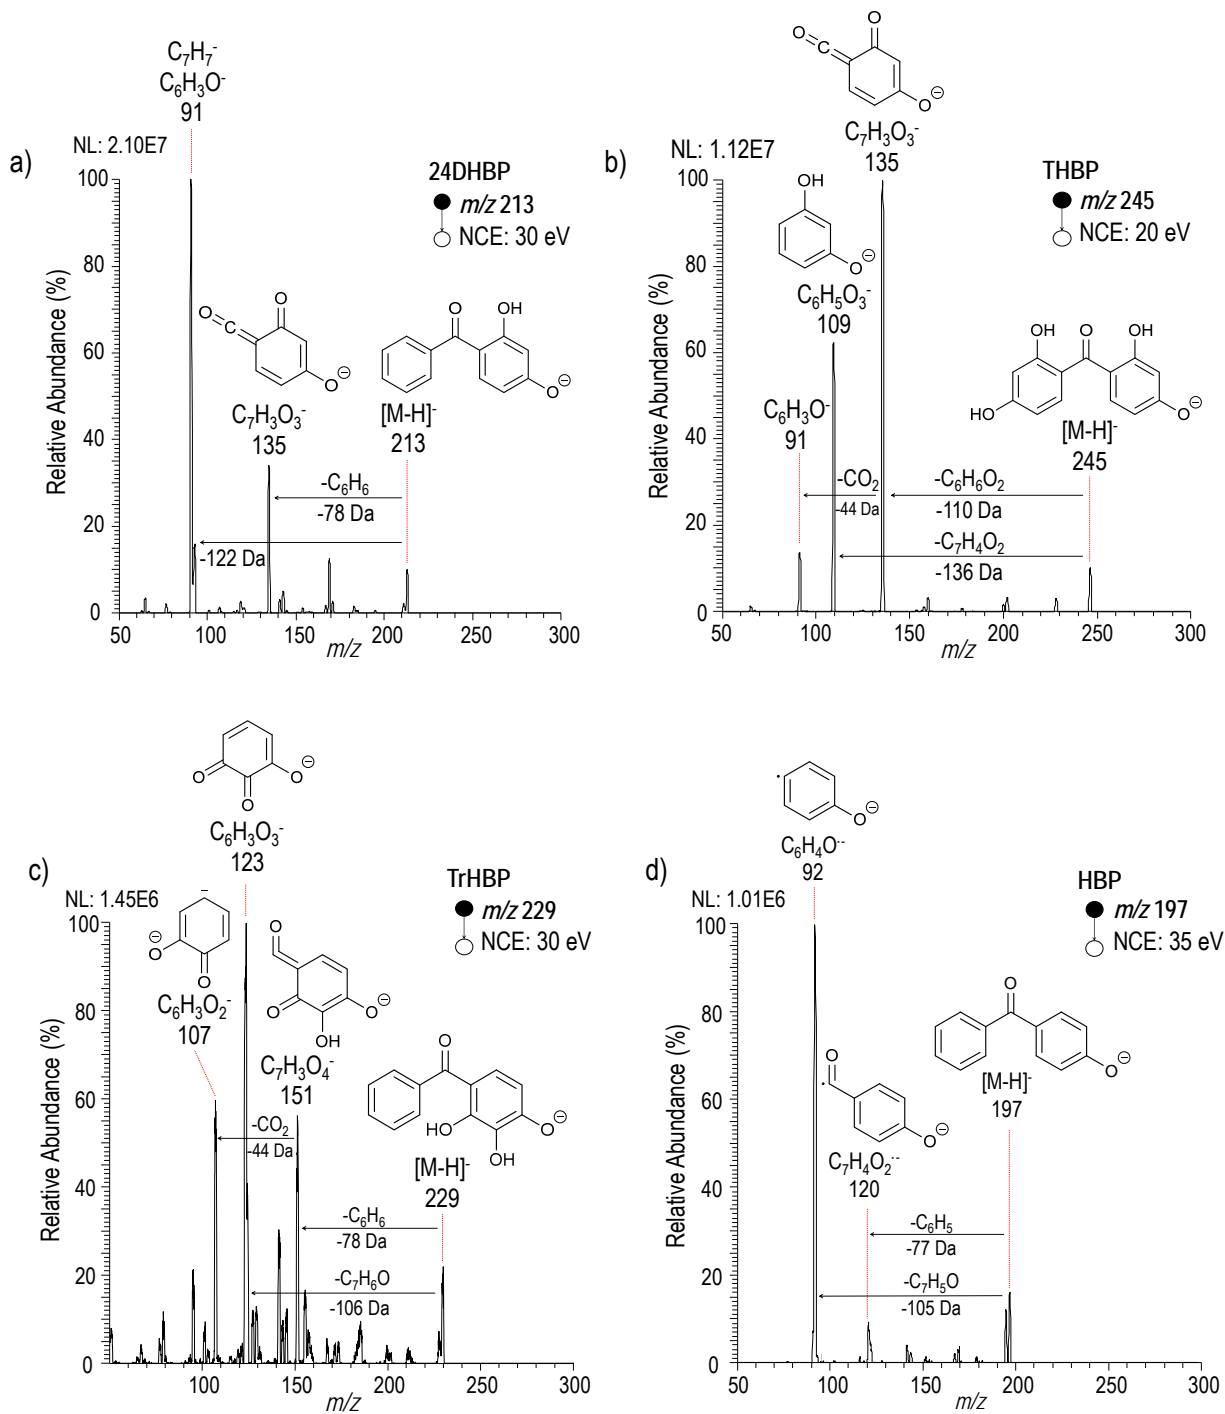

**Figure S6:** Product ion scan spectrum of a) 24DHBP, b) THBP, c) TrHBP and d) HBP acquired in positive ion mode.



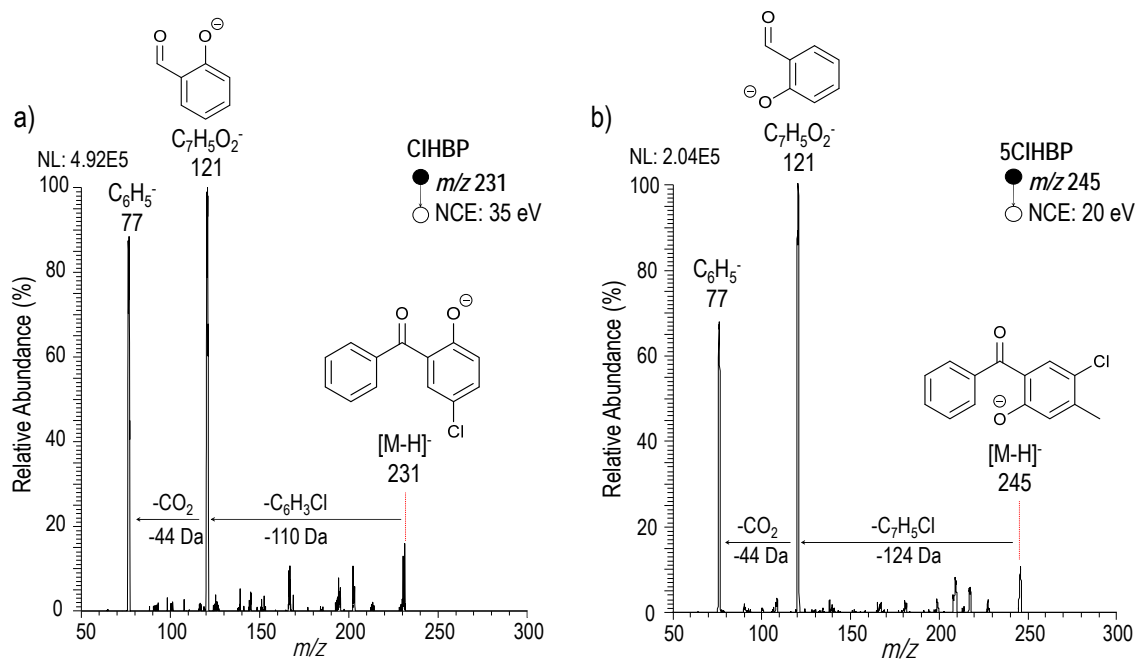

**Figure S7:** Product ion scan spectrum of a) CIHBP and b) 5CIHBP acquired in positive ion mode.

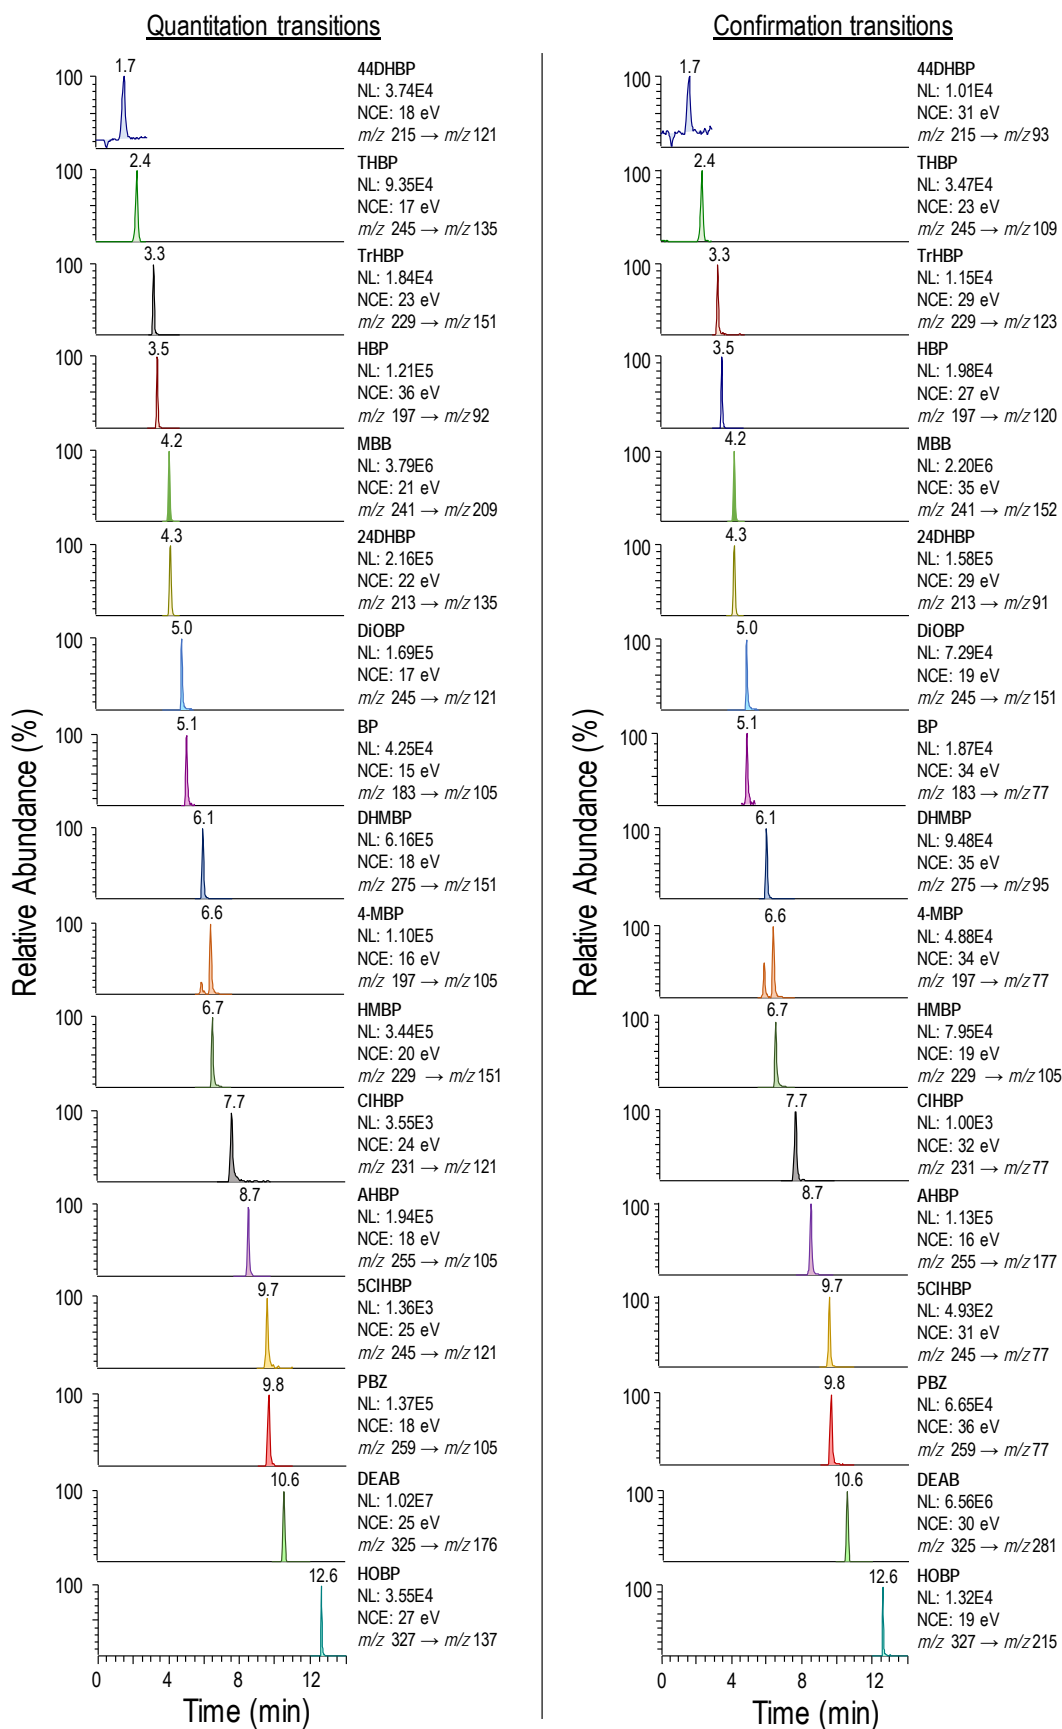

**Figure S8:** MRM chromatogram with quantitation and confirmation transitions of the yogurt spiked sample at  $50 \mu\text{g kg}^{-1}$  level.

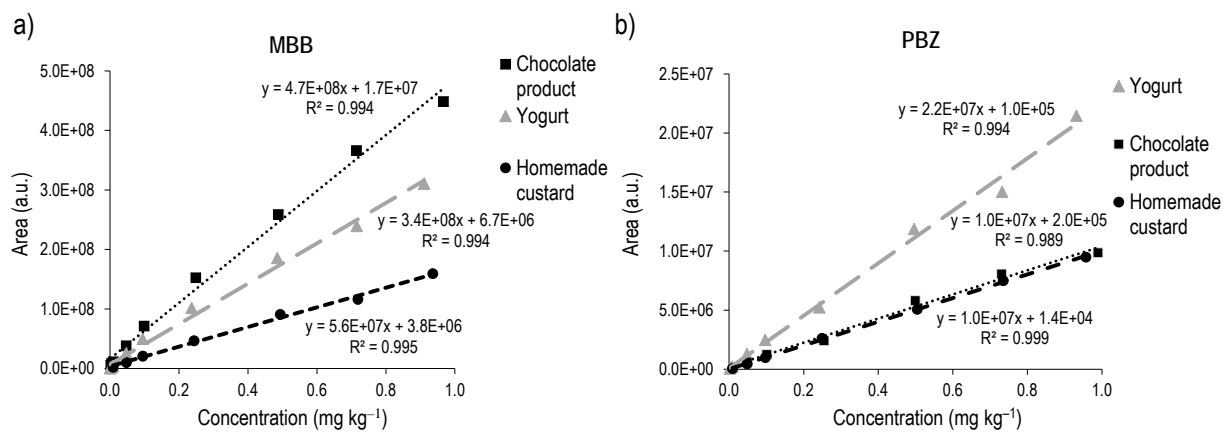

**Figure S9:** Matrix matched calibration curves for a) MBB and b) PBZ in different matrices.
